# Supplementary material for: Prediction of Mg Alloy Corrosion Based on Machine Learning Models
Source: Hindawi journal article supplement (doi:10.1155/2022/9597155), 2022-06-08
Supplement: f1 [file 9597155.f1.pdf]

Table S1 The specific corrosion data.

| No. | Al    | Zn    | Mn    | Si    | Fe    | Cu   | Ni | Ca    | Sr | Sn   | Cl ion (mol·L-1) | $I_{\text{corr}}$ (A·cm <sup>-2</sup> ) | $E_{\text{corr}}$ (V) |
|-----|-------|-------|-------|-------|-------|------|----|-------|----|------|------------------|-----------------------------------------|-----------------------|
| 1   | 4.24  | —     | 0.36  | —     | —     | —    | —  | —     | —  | —    | 0.613            | 2.24E-04                                | -1.46                 |
| 2   | 4.3   | —     | 0.36  | —     | —     | —    | —  | 0.17  | —  | —    | 0.613            | 3.86E-05                                | -1.59                 |
| 3   | 4.42  | —     | 0.37  | —     | —     | —    | —  | 0.75  | —  | —    | 0.613            | 4.65E-05                                | -1.58                 |
| 4   | 4.42  | —     | 0.36  | —     | —     | —    | —  | 1.58  | —  | —    | 0.613            | 3.78E-05                                | -1.62                 |
| 5   | 4.39  | —     | 0.35  | —     | —     | —    | —  | 3.69  | —  | —    | 0.613            | 2.58E-04                                | -1.48                 |
| 6   | 1.03  | 0.94  | —     | —     | —     | —    | —  | 0     | —  | 8.02 | 0.613            | 5.42E-05                                | -1.54                 |
| 7   | 0.93  | 1.07  | —     | —     | —     | —    | —  | 1.05  | —  | 8.08 | 0.613            | 5.19E-05                                | -1.476                |
| 8   | 0.96  | 0.89  | —     | —     | —     | —    | —  | 2.09  | —  | 7.95 | 0.613            | 1.77E-04                                | -1.554                |
| 9   | 1.05  | 1.07  | —     | —     | —     | —    | —  | 3.03  | —  | 8.1  | 0.613            | 1.65E-04                                | -1.522                |
| 10  | 5     | —     | —     | —     | —     | —    | —  | —     | —  | —    | 0.105            | 3.29E-04                                | -1.54                 |
| 11  | 5     | —     | 0.3   | —     | —     | —    | —  | —     | —  | —    | 0.105            | 1.25E-04                                | -1.569                |
| 12  | 5     | —     | 0.6   | —     | —     | —    | —  | —     | —  | —    | 0.105            | 1.11E-04                                | -1.566                |
| 13  | 5     | —     | 1     | —     | —     | —    | —  | —     | —  | —    | 0.105            | 8.38E-05                                | -1.562                |
| 14  | —     | 4.09  | 0.22  | —     | —     | —    | —  | —     | —  | —    | 0.148            | 3.07E-06                                | -1.559                |
| 15  | —     | 3.89  | 0.25  | —     | —     | —    | —  | 0.25  | —  | —    | 0.148            | 2.79E-06                                | -1.58                 |
| 16  | —     | 4.23  | 0.24  | —     | —     | —    | —  | —     | —  | 0.25 | 0.148            | 4.52E-06                                | -1.587                |
| 17  | 0.023 | 0.003 | 0.027 | 0.033 | 0.007 | —    | —  | 0.517 | —  | —    | 0.148            | 1.86E-04                                | -1.876                |
| 18  | 0.018 | 0.521 | 0.023 | 0.038 | 0.008 | —    | —  | 0.525 | —  | —    | 0.148            | 1.89E-04                                | -1.713                |
| 19  | 0.015 | 1.102 | 0.029 | 0.032 | 0.007 | —    | —  | 0.521 | —  | —    | 0.148            | 1.78E-04                                | -1.672                |
| 20  | 0.026 | 3.121 | 0.032 | 0.032 | 0.009 | —    | —  | 0.515 | —  | —    | 0.148            | 2.32E-04                                | -1.728                |
| 21  | 0.017 | 4.481 | 0.025 | 0.031 | 0.006 | —    | —  | 0.528 | —  | —    | 0.148            | 3.23E-04                                | -1.5                  |
| 22  | 0.022 | 6.211 | 0.027 | 0.04  | 0.01  | —    | —  | 0.523 | —  | —    | 0.148            | 3.65E-04                                | -1.776                |
| 23  | 0.021 | 8.983 | 0.029 | 0.035 | 0.008 | —    | —  | 0.519 | —  | —    | 0.148            | 4.65E-04                                | -1.795                |
| 24  | 0     | 4.14  | —     | —     | —     | —    | —  | 0.22  | —  | —    | 0.148            | 1.34E-04                                | -1.64                 |
| 25  | 0.92  | 3.95  | —     | —     | —     | —    | —  | 0.29  | —  | —    | 0.148            | 8.10E-05                                | -1.6                  |
| 26  | 3.12  | 3.98  | —     | —     | —     | —    | —  | 0.26  | —  | —    | 0.148            | 2.20E-05                                | -1.61                 |
| 27  | 4.85  | 3.88  | —     | —     | —     | —    | —  | 0.24  | —  | —    | 0.148            | 5.02E-04                                | -1.55                 |
| 28  | 7.66  | 3.91  | —     | —     | —     | —    | —  | 0.22  | —  | —    | 0.148            | 1.00E-03                                | -1.55                 |
| 29  | 10.3  | 4     | —     | —     | —     | —    | —  | 0.18  | —  | —    | 0.148            | 1.24E-03                                | -1.55                 |
| 30  | 5.65  | 2.7   | 0.11  | 0.12  | —     | 0.08 | —  | —     | —  | —    | 0.613            | 1.36E-05                                | -1.453                |
| 31  | —     | —     | 0.52  | —     | —     | —    | —  | 0.65  | —  | —    | 0.613            | 2.81E-05                                | -1.552                |
| 32  | 2.38  | —     | 0.48  | —     | —     | —    | —  | 0.68  | —  | —    | 0.613            | 6.73E-05                                | -1.452                |
| 33  | —     | —     | 0.54  | —     | —     | —    | —  | 0.74  | —  | 9.14 | 0.613            | 8.85E-05                                | -1.522                |

|    |       |        |        |        |        |         |         |        |      |      |       |          |        |
|----|-------|--------|--------|--------|--------|---------|---------|--------|------|------|-------|----------|--------|
| 34 | —     | 3.9    | 0.56   | —      | —      | —       | —       | 0.71   | —    | —    | 0.613 | 2.01E-05 | -1.518 |
| 35 | —     | 2.11   | <0.01  | <0.01  | <0.01  | <0.01   | —       | 0.33   | 0    | —    | 0.148 | 1.92E-04 | -1.79  |
| 36 | —     | 2.05   | <0.01  | <0.01  | <0.01  | <0.01   | —       | 0.34   | 0.12 | —    | 0.148 | 2.05E-04 | -1.79  |
| 37 | —     | 2.08   | <0.01  | <0.01  | <0.01  | <0.01   | —       | 0.32   | 0.34 | —    | 0.148 | 2.44E-04 | -1.8   |
| 38 | —     | 2.06   | <0.01  | <0.01  | <0.01  | <0.01   | —       | 0.34   | 0.56 | —    | 0.148 | 3.27E-04 | -1.82  |
| 39 | —     | 2.03   | <0.01  | <0.01  | <0.01  | <0.01   | —       | 0.36   | 1.25 | —    | 0.148 | 4.13E-04 | -1.85  |
| 40 | —     |        |        | <0.001 | <0.005 | <0.001  | <0.001  | —      | 1.8  | —    | 0.148 | 2.14E-05 | -1.53  |
| 41 | —     |        |        | <0.001 | <0.005 | <0.001  | <0.001  | 0.85   | 1.96 | —    | 0.148 | 1.84E-05 | -1.47  |
| 42 | —     | 0.84   |        | <0.001 | <0.005 | <0.001  | <0.001  | —      | 1.87 | —    | 0.148 | 4.68E-06 | -1.53  |
| 43 | —     | 3.892  | 0.011  | —      | 0.001  | 0.001   | <0.001  | 0.498  | —    | —    | 0.148 | 8.85E-06 | -1.527 |
| 44 | —     | 3.887  | 0.421  | —      | 0.001  | 0.001   | <0.001  | 0.501  | —    | —    | 0.148 | 4.15E-06 | -1.473 |
| 45 | —     | 3.888  | 0.831  | —      | 0.001  | 0.001   | <0.001  | 0.501  | —    | —    | 0.148 | 2.86E-06 | -1.414 |
| 46 | 0.065 | 0.24   | 0.066  | —      | —      | —       | —       | 0.2    | —    | —    | 0.148 | 3.23E-04 | -1.816 |
| 47 | 0.058 | 0.51   | 0.07   | —      | —      | —       | —       | 0.22   | —    | —    | 0.148 | 2.59E-04 | -1.809 |
| 48 | 0.072 | 1      | 0.071  | —      | —      | —       | —       | 0.21   | —    | —    | 0.148 | 2.67E-04 | -1.804 |
| 49 | 0.061 | 1.95   | 0.068  | —      | —      | —       | —       | 0.22   | —    | —    | 0.148 | 3.78E-04 | -1.824 |
| 50 | 0.04  | 0.01   | 0.02   | 0.01   | 0.0016 | 0.003   | 0.0002  | 0.03   | —    | —    | 0.148 | 2.06E-05 | -1.505 |
| 51 | 0.04  | 0.01   | 0.02   | 0.01   | 0.0018 | 0.003   | 0.0002  | 0.41   | —    | —    | 0.148 | 1.49E-05 | -1.525 |
| 52 | 0.04  | 0.01   | 0.02   | 0.01   | 0.0015 | 0.003   | 0.0002  | 0.84   | —    | —    | 0.148 | 2.04E-05 | -1.538 |
| 53 | —     | 0.9409 | —      | —      | —      | —       | 0.0083  | 0.1568 | —    | —    | 0.148 | 1.59E-04 | -1.49  |
| 54 | —     | 0.9272 | —      | —      | —      | —       | —       | 1.5417 | —    | —    | 0.148 | 2.66E-04 | -1.5   |
| 55 | —     | 2.7281 | —      | —      | —      | —       | —       | 0.1663 | —    | —    | 0.148 | 6.44E-05 | -1.52  |
| 56 | —     | 2.7851 | —      | —      | 0.0185 | —       | —       | 1.6579 | —    | —    | 0.148 | 3.59E-05 | -1.58  |
| 57 | —     | 4.6785 | —      | —      | —      | —       | —       | 0.1899 | —    | —    | 0.148 | 1.15E-04 | -1.51  |
| 58 | —     | 4.0209 | —      | —      | —      | —       | —       | 1.4101 | —    | —    | 0.148 | 1.30E-04 | -1.5   |
| 59 | —     | 3.63   | —      | 0.06   | 0.04   | —       | —       | —      | —    | 0    | 0.142 | 6.64E-06 | -1.58  |
| 60 | —     | 3.56   | —      | 0.04   | 0.03   | —       | —       | —      | —    | 0.92 | 0.142 | 2.50E-06 | -1.54  |
| 61 | —     | 3.56   | —      | 0.03   | 0.02   | —       | —       | —      | —    | 1.43 | 0.142 | 1.06E-06 | -1.51  |
| 62 | —     | 3.58   | —      | 0.07   | 0.03   | —       | —       | —      | —    | 1.88 | 0.142 | 4.06E-06 | -1.56  |
| 63 | 12.7  | —      | 0.0046 | —      | 0.0155 | 0.00029 | <0.0002 | 0      | —    | —    | 0.087 | 1.00E-04 | -1.472 |
| 64 | 8.7   | —      | 0.0235 | —      | 0.002  | 0.00072 | <0.0002 | 0.31   | —    | —    | 0.087 | 5.20E-06 | -1.534 |
| 65 | 11.9  | —      | 0.039  | —      | 0.0251 | 0.00352 | <0.0002 | 1.12   | —    | —    | 0.087 | 8.50E-05 | -1.508 |
| 66 | 8.8   | —      | 0.033  | —      | 0.013  | 0.00253 | <0.0002 | 1.54   | —    | —    | 0.087 | 8.10E-05 | -1.495 |
| 67 | 7.3   | —      | 0.42   | —      | 0.011  | 0.0005  | 0.0004  | 0      | —    | —    | 0.087 | 4.90E-06 | -1.536 |

|     |       |       |        |       |         |         |         |       |   |   |       |          |         |
|-----|-------|-------|--------|-------|---------|---------|---------|-------|---|---|-------|----------|---------|
| 68  | 8.4   | —     | 0.3    | —     | 0.0028  | 0.00361 | <0.0002 | 0.36  | — | — | 0.087 | 7.90E-06 | -1.537  |
| 69  | 9     | —     | 0.4    | —     | 0.0044  | 0.00219 | <0.0002 | 0.85  | — | — | 0.087 | 1.40E-05 | -1.511  |
| 70  | 10.1  | —     | 0.36   | —     | 0.0058  | 0.00227 | <0.0002 | 1.64  | — | — | 0.087 | 1.90E-05 | -1.527  |
| 71  | —     | 3.14  | —      | —     | 0.012   | 0.0015  | 0.0008  | 0.4   | — | — | 0.148 | 2.05E-06 | -1.53   |
| 72  | 0.029 | 0     | 0.022  | 0.039 | 0.01    | —       | —       | 0     | — | — | 0.148 | 3.71E-04 | -2.0274 |
| 73  | 0.022 | 1.289 | 0.043  | 0.029 | 0.008   | —       | —       | 0     | — | — | 0.148 | 2.83E-04 | -1.7626 |
| 74  | 0.018 | 2.478 | 0.032  | 0.033 | 0.01    | —       | —       | 0     | — | — | 0.148 | 2.43E-04 | -1.7445 |
| 75  | 0.024 | 4.124 | 0.028  | 0.025 | 0.009   | —       | —       | 0     | — | — | 0.148 | 2.12E-04 | -1.7106 |
| 76  | 0.023 | 1.324 | 0.024  | 0.038 | 0.008   | —       | —       | 0.831 | — | — | 0.148 | 1.80E-04 | -1.6843 |
| 77  | 0.018 | 2.446 | 0.045  | 0.039 | 0.009   | —       | —       | 0.852 | — | — | 0.148 | 2.22E-04 | -1.7211 |
| 78  | 0.027 | 4.21  | 0.037  | 0.028 | 0.007   | —       | —       | 0.4   | — | — | 0.148 | 3.18E-04 | -1.7477 |
| 79  | —     | 5.026 | 0.033  | —     | 0.012   | —       | —       | 0.497 | — | — | 0.148 | 1.46E-05 | -1.48   |
| 80  | —     | 4.981 | 0.028  | —     | 0.009   | —       | —       | 0.501 | — | — | 0.148 | 1.33E-05 | -1.49   |
| 81  | —     | 4.993 | 0.032  | —     | 0.013   | —       | —       | 0.498 | — | — | 0.148 | 7.40E-06 | -1.47   |
| 82  | —     | 5.031 | 0.035  | —     | 0.017   | —       | —       | 0.499 | — | — | 0.148 | 2.05E-05 | -1.47   |
| 83  | —     | 4.937 | 0.032  | —     | 0.021   | —       | —       | 0.51  | — | — | 0.148 | 3.79E-05 | -1.49   |
| 84  | 17    | 3     | —      | —     | —       | 0       | —       | —     | — | — | 0.526 | 3.52E-02 | -1.45   |
| 85  | 17    | 3     | —      | —     | —       | 0.5     | —       | —     | — | — | 0.526 | 1.24E-01 | -1.44   |
| 86  | 17    | 3     | —      | —     | —       | 1.5     | —       | —     | — | — | 0.526 | 5.86E-02 | -1.42   |
| 87  | 17    | 3     | —      | —     | —       | 3       | —       | —     | — | — | 0.526 | 2.00E-02 | -1.32   |
| 88  | 17    | 3     | —      | —     | —       | 5       | —       | —     | — | — | 0.526 | 1.66E-01 | -1.51   |
| 89  | 17    | 3     | —      | —     | —       | 7       | —       | —     | — | — | 0.526 | 5.08E-02 | -1.38   |
| 90  | 17    | 3     | —      | —     | —       | 10      | —       | —     | — | — | 0.526 | 4.08E-02 | -1.31   |
| 91  | —     | —     | —      | —     | —       | —       | —       | —     | — | — | 0.613 | 1.00E-05 | -1.72   |
| 92  | —     | —     | —      | —     | —       | —       | —       | —     | — | — | 0.613 | 1.37E-05 | -1.728  |
| 93  | —     | —     | —      | —     | —       | —       | —       | —     | — | — | 0.613 | 1.77E-05 | -1.715  |
| 94  | —     | —     | —      | —     | —       | —       | —       | —     | — | — | 0.613 | 1.98E-05 | -1.712  |
| 95  | —     | 30    | 0.8    | —     | —       | —       | —       | 4     | — | — | 0.142 | 1.04E-04 | -1.219  |
| 96  | —     | 30    | 0.8    | —     | —       | —       | —       | 4     | — | — | 0.142 | 3.46E-05 | -1.1174 |
| 97  | —     | 30    | 0.8    | —     | —       | —       | —       | 4     | — | — | 0.142 | 1.61E-05 | -1.1173 |
| 98  | —     | 30    | 0.8    | —     | —       | —       | —       | 4     | — | — | 0.142 | 7.18E-05 | -1.1175 |
| 99  | —     | 0.001 | —      | —     | —       | —       | —       | —     | — | — | 0.148 | 6.80E-04 | -1.581  |
| 100 | —     | 1.12  | <0.002 | —     | <0.0016 | <0.002  | —       | —     | — | — | 0.148 | 2.34E-05 | -1.527  |
| 101 | —     | 5.1   | —      | —     | —       | —       | —       | —     | — | — | 0.148 | 1.17E-05 | -1.477  |

|     |        |        |        |        |        |         |         |        |     |      |       |          |        |
|-----|--------|--------|--------|--------|--------|---------|---------|--------|-----|------|-------|----------|--------|
| 102 | —      | 7.05   |        | —      | —      | —       | —       | —      | —   | —    | 0.148 | 5.18E-05 | -1.543 |
| 103 | —      | 3.98   |        | —      | —      | —       | —       | —      | —   | —    | 0.148 | 1.55E-04 | -1.51  |
| 104 | —      | 3.98   |        | —      | —      | —       | —       | —      | —   | —    | 0.148 | 2.23E-05 | 1.53   |
| 105 | —      | 2.254  | 0.471  | —      | 0.009  | 0.004   | —       | 1.918  | —   | —    | 0.148 | 5.57E-05 | -1.49  |
| 106 | —      | 2.186  | 0.514  | —      | 0.01   | 0.007   | —       | 1.986  | —   | —    | 0.148 | 2.96E-05 | -1.51  |
| 107 | —      | 2.068  | 0.603  | —      | 0.008  | 0.005   | —       | 2.042  | —   | —    | 0.148 | 4.05E-05 | -1.51  |
| 108 | —      | 2.163  | 0.554  | —      | 0.009  | 0.008   | —       | 1.955  | —   | —    | 0.148 | 6.47E-05 | -1.5   |
| 109 | —      | 2.125  | 0.547  | —      | 0.01   | 0.005   | —       | 2.08   | —   | —    | 0.148 | 8.43E-05 | -1.5   |
| 110 | —      | —      | 0.01   | 0.001  | 0.013  | 0.001   | —       | —      | —   | —    | 0.613 | 4.10E-04 | -1.56  |
| 111 | —      | —      | 0.12   | 0.001  | 0.01   | 0.001   | —       | —      | —   | —    | 0.613 | 1.13E-04 | -1.545 |
| 112 | —      | —      | 0.21   | 0.001  | 0.01   | 0.001   | —       | —      | —   | —    | 0.613 | 5.13E-05 | -1.546 |
| 113 | —      | —      | 0.36   | 0.001  | 0.008  | 0.003   | —       | —      | —   | —    | 0.613 | 1.86E-05 | -1.485 |
| 114 | —      | —      | 0.45   | 0.001  | 0.015  | 0.002   | —       | —      | —   | —    | 0.613 | 1.58E-05 | -1.512 |
| 115 | —      | 3      | 0      | —      | —      | —       | —       | 0.2    | —   | —    | 0.148 | 6.57E-05 | -1.705 |
| 116 | —      | 3      | 0.3    | —      | —      | —       | —       | 0.2    | —   | —    | 0.148 | 3.07E-05 | -1.502 |
| 117 | —      | 3      | 0.5    | —      | —      | —       | —       | 0.2    | —   | —    | 0.148 | 3.23E-05 | -1.509 |
| 118 | —      | 3      | 0.7    | —      | —      | —       | —       | 0.2    | —   | —    | 0.148 | 4.82E-05 | -1.556 |
| 119 | —      | 3      | 0.9    | —      | —      | —       | —       | 0.2    | —   | —    | 0.148 | 3.50E-05 | -1.582 |
| 120 | —      | 2      | —      | —      | —      | —       | —       | 0      | 0.3 | —    | 0.148 | 2.08E-04 | -1.718 |
| 121 | —      | 2      | —      | —      | —      | —       | —       | 0.1    | 0.3 | —    | 0.148 | 2.25E-04 | -1.76  |
| 122 | —      | 2      | —      | —      | —      | —       | —       | 0.3    | 0.3 | —    | 0.148 | 2.44E-04 | -1.795 |
| 123 | —      | 2      | —      | —      | —      | —       | —       | 0.5    | 0.3 | —    | 0.148 | 3.44E-04 | -1.857 |
| 124 | 12.7   | —      | —      | —      | —      | 0.0003  | <0.0002 |        | —   | —    | 0.087 | 8.60E-05 | -1.472 |
| 125 | 7.3    |        | 0.424  | —      | 0.011  | 0.0005  | 0.0004  |        | —   | —    | 0.087 | 5.20E-06 | -1.535 |
| 126 | 8.7    |        | 0.0235 | —      | 0.002  | 0.00007 | <0.0002 | 0.31   | —   | —    | 0.087 | 5.50E-06 | -1.535 |
| 127 | 8.2    |        | 0.03   | —      | 0.0077 | 0.001   | <0.0002 |        | —   | 0.38 | 0.087 | 4.50E-05 | -1.511 |
| 128 | 3.22   | 0.74   | 0.32   | —      | —      | —       | —       | 0      | —   | —    | 1.026 | 5.11E-05 | -1.479 |
| 129 | 2.95   | 0.71   | 0.28   | —      | —      | —       | —       | 0.08   | —   | —    | 1.026 | 5.46E-06 | -1.43  |
| 130 | 3.09   | 0.79   | 0.31   | —      | —      | —       | —       | 0.52   | —   | —    | 1.026 | 2.78E-06 | -1.375 |
| 131 | 2.86   | 0.66   | 0.25   | —      | —      | —       | —       | 0.93   | —   | —    | 1.026 | 7.35E-06 | -1.444 |
| 132 | 2.81   | 0.77   | 0.29   | —      | —      | —       | —       | 1.31   | —   | —    | 1.026 | 5.01E-06 | -1.465 |
| 133 | 3.4591 | 0.5911 | 0.3233 | 0.0549 | 0.0095 | —       | —       | 0      | —   | —    | 0.613 | 5.83E-06 | -1.41  |
| 134 | 3.1104 | 1.0452 | 0.4459 | 0.019  | 0.0082 | —       | —       | 0.0328 | —   | —    | 0.613 | 8.02E-06 | -1.34  |
| 135 | 3.3262 | 1.0167 | 0.6479 | 0.0219 | 0.0085 | —       | —       | 0.137  | —   | —    | 0.613 | 3.50E-06 | -1.35  |

|     |        |        |        |        |        |   |   |        |   |        |       |          |         |
|-----|--------|--------|--------|--------|--------|---|---|--------|---|--------|-------|----------|---------|
| 136 | 3.4552 | 0.8744 | 0.3909 | 0.0166 | 0.0124 | — | — | 0.1887 | — | —      | 0.613 | 2.37E-06 | -1.38   |
| 137 | 0      | —      | —      | —      | —      | — | — | 2.05   | — | —      | 0.613 | 2.28E-04 | -1.746  |
| 138 | 2.26   | —      | —      | —      | —      | — | — | 2.17   | — | —      | 0.613 | 3.18E-05 | -1.681  |
| 139 | 3.1    | —      | —      | —      | —      | — | — | 1.73   | — | —      | 0.613 | 1.86E-05 | -1.653  |
| 140 | 5.03   | —      | —      | —      | —      | — | — | 1.67   | — | —      | 0.613 | 2.71E-05 | -1.663  |
| 141 | 9      | 0.5    | —      | —      | —      | — | — | 0      | — | —      | 0.875 | 1.30E-04 | -1.638  |
| 142 | 9      | 0.5    | —      | —      | —      | — | — | 0.3    | — | —      | 0.875 | 7.40E-05 | -1.632  |
| 143 | 9      | 0.5    | —      | —      | —      | — | — | 0.5    | — | —      | 0.875 | 3.06E-05 | -1.623  |
| 144 | 9      | 0.5    | —      | —      | —      | — | — | 1      | — | —      | 0.875 | 2.84E-05 | -1.603  |
| 145 | 9      | 0.5    | —      | —      | —      | — | — | 2      | — | —      | 0.875 | 1.35E-05 | -1.595  |
| 146 | 9      | 0.5    | —      | —      | —      | — | — | 3      | — | —      | 0.875 | 1.19E-05 | -1.594  |
| 147 | 9      | 0.5    | —      | —      | —      | — | — | 4      | — | —      | 0.875 | 1.70E-05 | -1.597  |
| 148 | —      | —      | —      | —      | 0.0226 | — | — | —      | — | 0.5746 | 0.613 | 2.76E-05 | -1.6411 |
| 149 | —      | —      | 0.1367 | —      | 0      | — | — | —      | — | 1.0874 | 0.613 | 3.39E-05 | -1.6351 |
| 150 | —      | —      | —      | —      | 0      | — | — | —      | — | 1.6102 | 0.613 | 1.90E-05 | -1.6721 |
| 151 | —      | —      | —      | —      | 0      | — | — | —      | — | 2.1258 | 0.613 | 2.47E-05 | -1.5748 |
| 152 | 2.96   | —      | 0.34   | —      | —      | — | — | —      | — | 0      | 0.613 | 5.62E-05 | -1.41   |
| 153 | 2.98   | —      | 0.36   | —      | —      | — | — | —      | — | 0.94   | 0.613 | 3.46E-05 | -1.35   |
| 154 | 2.93   | —      | 0.32   | —      | —      | — | — | —      | — | 1.42   | 0.613 | 8.37E-05 | -1.426  |
| 155 | 2.94   | —      | 0.34   | —      | —      | — | — | —      | — | 1.81   | 0.613 | 1.24E-04 | -1.451  |
| 156 | 2.12   | —      | 0.21   | 1.11   | —      | — | — | —      | — | 0      | 0.613 | 3.32E-04 | -1.55   |
| 157 | 2.22   | —      | 0.23   | 1.09   | —      | — | — | —      | — | 0.57   | 0.613 | 6.73E-05 | -1.59   |
| 158 | 2.24   | —      | 0.18   | 1.03   | —      | — | — | —      | — | 1.16   | 0.613 | 4.38E-05 | -1.58   |
| 159 | 2.05   | —      | 0.25   | 0.98   | —      | — | — | —      | — | 0.98   | 0.613 | 1.66E-05 | -1.61   |
| 160 | 3.52   | 5.02   | —      | —      | —      | — | — | —      | — | 0      | 0.613 | 6.66E-05 | -1.5173 |
| 161 | 3.5    | 5      | —      | —      | —      | — | — | —      | — | 0.51   | 0.613 | 9.42E-06 | -1.3628 |
| 162 | 3.56   | 5.01   | —      | —      | —      | — | — | —      | — | 1.03   | 0.613 | 6.71E-06 | -1.3309 |
| 163 | 3.51   | 5      | —      | —      | —      | — | — | —      | — | 2      | 0.613 | 1.14E-05 | -1.4235 |
| 164 | 3.54   | 5.02   | —      | —      | —      | — | — | —      | — | 3.01   | 0.613 | 2.51E-05 | -1.4941 |

Table S2 Nine rows of new corrosion data.

| No. | Zr  | Nd   | Ni    | Al    | Zn  | Mn   | Fe    | Cu    | Cl ion (mol·L <sup>-1</sup> ) | $I_{\text{corr}}$ (A·cm <sup>-2</sup> ) | $E_{\text{corr}}$ (V) |
|-----|-----|------|-------|-------|-----|------|-------|-------|-------------------------------|-----------------------------------------|-----------------------|
| 1   | 0.7 | 0    | 0.002 | 5.85  | 2.9 | 0.28 | 0.003 | 0.015 | 0.613                         | 1.57E-04                                | -1.5177               |
| 2   | 0.9 | 0    | 0.002 | 5.85  | 2.9 | 0.28 | 0.003 | 0.015 | 0.613                         | 1.94E-04                                | -1.5405               |
| 3   | 0   | 0.46 | 0     | 0.024 | 0   | —    | 0.015 | —     | 0.613                         | 9.42E-03                                | -1.6251               |
| 4   | 0   | 1.05 | 0     | 0.021 | 0   | —    | 0.021 | —     | 0.613                         | 7.63E-03                                | -1.6124               |
| 5   | 0   | 1.48 | 0     | 0.019 | 0   | —    | 0.017 | —     | 0.613                         | 6.11E-03                                | -1.597                |
| 6   | 0   | 0    | 0.5   | —     | 4   | —    | —     | —     | 0.525                         | 1.40E-05                                | -1.587                |
| 7   | 0   | 0    | 1     | —     | 4   | —    | —     | —     | 0.525                         | 7.52E-05                                | -1.535                |
| 8   | 0   | 0    | 2     | —     | 4   | —    | —     | —     | 0.525                         | 2.72E-03                                | -1.536                |
| 9   | 0   | 0    | 4     | —     | 4   | —    | —     | —     | 0.525                         | 3.34E-03                                | -1.497                |
